# Supplementary material for: Isobavachalcone Attenuates NLRP3 Inflammasome-related Pyroptosis and Induces Apoptosis via Arresting Cell Cycle in Glioblastoma
Source: Research Square preprint supplement (doi:10.21203/rs.3.rs-1416834/v1), 2022-03-16
Supplement: Supplementary file 1 [file 35ccb6131f0eca267f091613.xlsx]

## Sheet: Sheet1
Table S1. Top 10 terms of GO functional enrichments of overlapped IBC-GBM targets
ONTOLOGY	ID	Description	GeneRatio	p.adjust	geneID
BP	GO:0010038	response to metal ion	2022-11-30	1.04929e-08	AKT1/ALOX15/APP/EGFR/MAOB/MAPK1/MAPK3/SNCA/TERT/AKR1C3/BACE1
BP	GO:0071248	cellular response to metal ion	2022-09-30	1.15762e-08	AKT1/ALOX15/APP/EGFR/MAPK1/MAPK3/SNCA/AKR1C3/BACE1
BP	GO:0018105	peptidyl-serine phosphorylation	2022-10-30	1.44883e-08	AKT1/AKT2/APP/CD44/EGFR/PDPK1/MAPK1/MAPK3/SNCA/AKT3
BP	GO:0071241	cellular response to inorganic substance	2022-09-30	1.8027e-08	AKT1/ALOX15/APP/EGFR/MAPK1/MAPK3/SNCA/AKR1C3/BACE1
BP	GO:0018209	peptidyl-serine modification	2022-10-30	1.8027e-08	AKT1/AKT2/APP/CD44/EGFR/PDPK1/MAPK1/MAPK3/SNCA/AKT3
BP	GO:0097164	ammonium ion metabolic process	2022-07-30	6.37418e-06	ACHE/AKR1B1/MAOA/MAOB/ODC1/SNCA/AKR1C3
BP	GO:0042180	cellular ketone metabolic process	2022-07-30	1.76179e-05	AKT1/AKT2/AKR1B1/CYP19A1/ODC1/SNCA/AKR1C3
BP	GO:0048732	gland development	2022-08-30	3.82137e-05	AKT1/AKT2/CYP19A1/DHODH/EGFR/ESR1/MAPK1/MAPK3
BP	GO:0042063	gliogenesis	2022-07-30	3.82137e-05	AKT1/AKT2/APP/EGFR/MAPK1/MAPK3/TERT
BP	GO:0031098	stress-activated protein kinase signaling cascade	2022-07-30	5.30521e-05	AKT1/AKR1B1/APP/EGFR/MAPK1/MAPK3/PTPN1
CC	GO:0005769	early endosome	2022-07-30	0.000130376	AKT2/APP/EGFR/MAPK1/MAPK3/PTPN1/BACE1
CC	GO:0045121	membrane raft	2022-06-30	0.000373359	APP/EGFR/KCNA3/MAPK1/MAPK3/BACE1
CC	GO:0098857	membrane microdomain	2022-06-30	0.000373359	APP/EGFR/KCNA3/MAPK1/MAPK3/BACE1
CC	GO:0098589	membrane region	2022-06-30	0.000373359	APP/EGFR/KCNA3/MAPK1/MAPK3/BACE1
CC	GO:0005770	late endosome	2022-05-30	0.00134932	CTSL/EGFR/MAPK1/MAPK3/BACE1
CC	GO:0043025	neuronal cell body	2022-06-30	0.0021953	APP/DHODH/PDPK1/MAPK1/SNCA/BACE1
CC	GO:0031983	vesicle lumen	2022-05-30	0.00317498	ALOX5/APP/EGFR/MAPK1/BACE1
CC	GO:0005925	focal adhesion	2022-05-30	0.00481945	CD44/EGFR/PDPK1/MAPK1/MAPK3
CC	GO:0005924	cell-substrate adherens junction	2022-05-30	0.00481945	CD44/EGFR/PDPK1/MAPK1/MAPK3
CC	GO:0030055	cell-substrate junction	2022-05-30	0.00481945	CD44/EGFR/PDPK1/MAPK1/MAPK3
MF	GO:0004674	Protein serine/threonine kinase activity	2022-07-30	0.00141769	AKT1/AKT2/EGFR/PDPK1/MAPK1/
					MAPK3/AKT3
MF	GO:0019902	phosphatase binding	2022-05-30	0.00141769	AKT1/EGFR/MAPK1/MAPK3/PTPN1
MF	GO:0004712	protein serine/threonine/tyrosine kinase activity	2022-03-30	0.00359306	AKT1/MAPK1/MAPK3
MF	GO:0005506	iron ion binding	2022-04-30	0.0056937	ALOX5/ALOX15/CYP19A1/SNCA
MF	GO:0005518	collagen binding	2022-03-30	0.0056937	ACHE/CD44/CTSL
MF	GO:0051219	phosphoprotein binding	2022-03-30	0.00589743	MAPK1/MAPK3/SNCA
MF	GO:0004497	monooxygenase activity	2022-03-30	0.00757339	CYP19A1/NOS2/AKR1C3
MF	GO:0005543	phospholipid binding	2022-05-30	0.00757339	AKT1/ALOX15/F3/F10/SNCA
MF	GO:0009055	electron transfer activity	2022-03-30	0.00897935	AKR1B1/CYP19A1/MAOB
MF	GO:0004175	endopeptidase activity	2022-04-30	0.0322003	CTSL/F3/F10/BACE1
Table S2. Top 30 terms of KEGG functional enrichments of overlapped IBC-GBM targets
ONTOLOGY	ID	Description	GeneRatio	p.adjust	geneID
KEGG	hsa04664	Fc epsilon RI signaling pathway	2022-07-29	1.51778e-07	AKT1/AKT2/ALOX5/PDPK1/MAPK1/MAPK3/AKT3
KEGG	hsa04066	HIF-1 signaling pathway	2022-07-29	1.56049e-06	AKT1/AKT2/EGFR/NOS2/MAPK1/MAPK3/AKT3
KEGG	hsa04917	Prolactin signaling pathway	2022-06-29	1.9726e-06	AKT1/AKT2/ESR1/MAPK1/MAPK3/AKT3
KEGG	hsa04919	Thyroid hormone signaling pathway	2022-07-29	2.03382e-06	AKT1/AKT2/ESR1/PDPK1/MAPK1/MAPK3/AKT3
KEGG	hsa05214	Glioma	2022-06-29	2.24432e-06	AKT1/AKT2/EGFR/MAPK1/MAPK3/AKT3
KEGG	hsa04926	Relaxin signaling pathway	2022-07-29	2.49419e-06	AKT1/AKT2/EGFR/NOS2/MAPK1/MAPK3/AKT3
KEGG	hsa04068	FoxO signaling pathway	2022-07-29	2.4944e-06	AKT1/AKT2/EGFR/PDPK1/MAPK1/MAPK3/AKT3
KEGG	hsa04910	Insulin signaling pathway	2022-07-29	2.94636e-06	AKT1/AKT2/PDPK1/MAPK1/MAPK3/PTPN1/AKT3
KEGG	hsa04915	Estrogen signaling pathway	2022-07-29	2.96731e-06	AKT1/AKT2/EGFR/ESR1/MAPK1/MAPK3/AKT3
KEGG	hsa04012	ErbB signaling pathway	2022-06-29	3.0441e-06	AKT1/AKT2/EGFR/MAPK1/MAPK3/AKT3
KEGG	hsa04933	AGE-RAGE signaling pathway in diabetic complications	2022-06-29	6.66393e-06	AKT1/AKT2/F3/MAPK1/MAPK3/AKT3
KEGG	hsa04370	VEGF signaling pathway	2022-05-29	9.14517e-06	AKT1/AKT2/MAPK1/MAPK3/AKT3
KEGG	hsa04071	Sphingolipid signaling pathway	2022-06-29	1.46156e-05	AKT1/AKT2/PDPK1/MAPK1/MAPK3/AKT3
KEGG	hsa04722	Neurotrophin signaling pathway	2022-06-29	1.46156e-05	AKT1/AKT2/PDPK1/MAPK1/MAPK3/AKT3
KEGG	hsa04371	Apelin signaling pathway	2022-06-29	2.85987e-05	AKT1/AKT2/NOS2/MAPK1/MAPK3/AKT3
KEGG	hsa04662	B cell receptor signaling pathway	2022-05-29	3.55653e-05	AKT1/AKT2/MAPK1/MAPK3/AKT3
KEGG	hsa04072	Phospholipase D signaling pathway	2022-06-29	4.26721e-05	AKT1/AKT2/EGFR/MAPK1/MAPK3/AKT3
KEGG	hsa04150	mTOR signaling pathway	2022-06-29	5.44209e-05	AKT1/AKT2/PDPK1/MAPK1/MAPK3/AKT3
KEGG	hsa04620	Toll-like receptor signaling pathway	2022-05-29	9.45699e-05	AKT1/AKT2/MAPK1/MAPK3/AKT3
KEGG	hsa04625	C-type lectin receptor signaling pathway	2022-05-29	9.45699e-05	AKT1/AKT2/MAPK1/MAPK3/AKT3
KEGG	hsa04668	TNF signaling pathway	2022-05-29	0.000128119	AKT1/AKT2/MAPK1/MAPK3/AKT3
KEGG	hsa04015	Rap1 signaling pathway	2022-06-29	0.000232334	AKT1/AKT2/EGFR/MAPK1/MAPK3/AKT3
KEGG	hsa04014	Ras signaling pathway	2022-06-29	0.000356088	AKT1/AKT2/EGFR/MAPK1/MAPK3/AKT3
KEGG	hsa04151	PI3K-Akt signaling pathway	2022-07-29	0.000477091	AKT1/AKT2/EGFR/PDPK1/MAPK1/MAPK3/AKT3
KEGG	hsa04022	cGMP-PKG signaling pathway	2022-05-29	0.000653582	AKT1/AKT2/MAPK1/MAPK3/AKT3
KEGG	hsa04010	MAPK signaling pathway	2022-06-29	0.00111991	AKT1/AKT2/EGFR/MAPK1/MAPK3/AKT3
KEGG	hsa04062	Chemokine signaling pathway	2022-05-29	0.00115008	AKT1/AKT2/MAPK1/MAPK3/AKT3
KEGG	hsa04152	AMPK signaling pathway	2022-04-29	0.00168183	AKT1/AKT2/PDPK1/AKT3
KEGG	hsa04024	cAMP signaling pathway	2022-05-29	0.00182651	AKT1/AKT2/MAPK1/MAPK3/AKT3
KEGG	hsa04630	JAK-STAT signaling pathway	2022-04-29	0.00451015	AKT1/AKT2/EGFR/AKT3
article title：Isobavachalcone attenuates NLRP3 inflammasome-related pyroptosis and induce apoptosis via arresting cell cycle in glioblastoma
journal name：Molecular Neurobiology
author names：Yueshan Wu, Jing Chang, Juanjuan Ge, Kangyan Xu, Quan Zhou, Xiaowen Zhang, Ni Zhu*, Meichun Hu*
affiliation and e-mail address of the corresponding author：zhuni@whu.edu.cn (Ni Zhu), humeichun.530@163.com (Meichun Hu)
